# Supplementary material
Source: PubMed Central journal article supplement (PMC8609463)
Supplement: jamapediatr-e214822-s001.pdf [file jamapediatr-e214822-s001.pdf]

## Supplementary Online Content

Barrett JT, Lee LK, Monuteaux MC, Farrell CA, Hoffmann JA, Fleegler EW.  
Association of county-level poverty and inequities with firearm-related mortality in US youth. *JAMA Pediatr*. Published online November 22, 2021.  
doi:10.1001/jamapediatrics.2021.4822

**eTable 1.** Mortality Rates and Incidence Rate Ratios for Total Firearm-Related Deaths and Specific Intents, by Age and Sex in 2007 & 2016

**eTable 2.** Adjusted Incidence Rate Ratios for Total Firearm Related and Specific Causes by County-Poverty Concentration

This supplementary material has been provided by the authors to give readers additional information about their work.

**eTable 1.** Mortality Rates and Incidence Rate Ratios for Total Firearm-Related Deaths and Specific Intents, by Age and Sex in 2007 & 2016

| Demographics      | Total Firearm-Related |      |                     |                     | Homicides          |      |                     |                     |
|-------------------|-----------------------|------|---------------------|---------------------|--------------------|------|---------------------|---------------------|
|                   | Rate (per 100,000)    |      | IRR                 |                     | Rate (per 100,000) |      | IRR                 |                     |
|                   | 2007                  | 2016 | 2007                | 2016                | 2007               | 2016 | 2007                | 2016                |
| Age Group (years) |                       |      |                     |                     |                    |      |                     |                     |
| 5-9               | 0.3                   | 0.4  | 0.3<br>(0.2-0.4)    | 0.3<br>(0.2-0.4)    | 0.2                | 0.3  | 0.3<br>(0.2-0.5)    | 0.7<br>(0.5-1.0)    |
| 10-14             | 1.2                   | 1.4  | referent            | referent            | 0.7                | 0.5  | referent            | referent            |
| 15-19             | 12.0                  | 12.5 | 10.3<br>(9.0-11.8)  | 9<br>(7.9-10.2)     | 8.6                | 7.6  | 11.6<br>(9.9-13.8)  | 16.5<br>(13.4-20.6) |
| 20-24             | 19.7                  | 21.4 | 16.9<br>(14.9-19.3) | 15.4<br>(13.6-17.4) | 13.2               | 13.1 | 17.8<br>(15.1-21.1) | 28.5<br>(23.3-35.4) |
| Sex               |                       |      |                     |                     |                    |      |                     |                     |
| Male              | 14.9                  | 15.8 | 8.2<br>(7.6-8.9)    | 6.7<br>(6.2-7.2)    | 10.1               | 9.6  | 7.8<br>(7.1-8.5)    | 6.9<br>(6.3-7.6)    |
| Female            | 1.8                   | 2.4  | referent            | referent            | 1.3                | 1.4  | referent            | referent            |
|                   |                       |      |                     |                     |                    |      |                     |                     |
| Demographics      | Suicides              |      |                     |                     | Unintentional      |      |                     |                     |
|                   | Rate (per 100,000)    |      | IRR                 |                     | Rate (per 100,000) |      | IRR                 |                     |
|                   | 2007                  | 2016 | 2007                | 2016                | 2007               | 2016 | 2007                | 2016                |
| Age Group (years) |                       |      |                     |                     |                    |      |                     |                     |
| 5-9               | 0.0                   | 0.0  | 0.0<br>(0.0-0.1)    | 0.0<br>(0.0-0.2)    | 0.1                | 0.1  | 0.8<br>(0.4-1.5)    | 0.7<br>(0.4-1.4)    |
| 10-14             | 0.3                   | 0.8  | referent            | referent            | 0.1                | 0.1  | referent            | referent            |
| 15-19             | 2.9                   | 4.5  | 11.2<br>(8.5-15.2)  | 5.7<br>(4.9-6.8)    | 0.3                | 0.3  | 2.7<br>(1.7-4.3)    | 2.2<br>(1.4-3.8)    |
| 20-24             | 6.0                   | 7.8  | 23.7<br>(18.0-31.8) | 10<br>(8.5-11.9)    | 0.4                | 0.3  | 3.1<br>(2.0-5.1)    | 2.7<br>(1.7-4.6)    |
| Sex               |                       |      |                     |                     |                    |      |                     |                     |
| Male              | 4.1                   | 5.7  | 9.3<br>(8.0-10.9)   | 6.4<br>(5.7-7.2)    | 0.4                | 0.3  | 13.8<br>(7.9-26.3)  | 6.7<br>(4.2-11.3)   |
| Female            | 0.4                   | 0.9  | referent            | referent            | 0.0                | 0.0  | referent            | referent            |

**eTable 2.** Adjusted Incidence Rate Ratios for Total Firearm Related and Specific Causes by County-Poverty Concentration

| Country Poverty Concentration           | Total Firearm Related |                      |                      | Homicides            |                      |                      |
|-----------------------------------------|-----------------------|----------------------|----------------------|----------------------|----------------------|----------------------|
|                                         | Model 1 <sup>a</sup>  | Model 2 <sup>b</sup> | Model 3 <sup>c</sup> | Model 1 <sup>a</sup> | Model 2 <sup>b</sup> | Model 3 <sup>c</sup> |
| 0-4.9%                                  | referent              | referent             | referent             | referent             | referent             | referent             |
| 5-9.9%                                  | 1.41 (1.21-1.64)      | 1.42 (1.22-1.65)     | 1.43 (1.23-1.65)     | 1.51 (1.20-1.91)     | 1.58 (1.26-2.00)     | 1.58 (1.26-2.00)     |
| 10-14.9%                                | 1.96 (1.68-2.28)      | 1.99 (1.70-2.31)     | 1.93 (1.66-2.24)     | 2.34 (1.86-2.95)     | 2.56 (2.03-3.23)     | 2.56 (2.03-3.23)     |
| 15-19.9%                                | 2.35 (2.01-2.73)      | 2.39 (2.05-2.79)     | 2.25 (1.94-2.61)     | 2.93 (2.33-3.69)     | 3.35 (2.66-4.22)     | 3.34 (2.65-4.21)     |
| >20%                                    | 2.37 (2.03-2.77)      | 2.46 (2.10-2.88)     | 2.29 (1.96-2.67)     | 2.71 (2.14-3.43)     | 3.55 (2.80-4.51)     | 3.55 (2.80-4.51)     |
| <b>Population Attributable Fraction</b> | 0.52 (0.44-0.58)      | 0.53 (0.45-0.59)     | 0.51 (0.43-0.57)     | 0.60 (0.50-0.68)     | 0.66 (0.57-0.73)     | 0.66 (0.57-0.73)     |

  

| Country Poverty Concentration           | Suicides             |                      |                      | Unintentional        |                      |                      |
|-----------------------------------------|----------------------|----------------------|----------------------|----------------------|----------------------|----------------------|
|                                         | Model 1 <sup>a</sup> | Model 2 <sup>b</sup> | Model 3 <sup>c</sup> | Model 1 <sup>a</sup> | Model 2 <sup>b</sup> | Model 3 <sup>c</sup> |
| 0-4.9%                                  | referent             | referent             | referent             | referent             | referent             | referent             |
| 5-9.9%                                  | 1.29 (1.06-1.57)     | 1.24 (1.03-1.51)     | 1.26 (1.05-1.51)     | 4.09 (1.02-16.41)    | 3.62 (0.90-14.50)    | 3.75 (0.94-15.0)     |
| 10-14.9%                                | 1.63 (1.34-1.97)     | 1.51 (1.25-1.84)     | 1.44 (1.20-1.73)     | 9.14 (2.29-36.40)    | 7.19 (1.81-28.70)    | 6.87 (1.73-27.3)     |
| 15-19.9%                                | 1.85 (1.53-2.25)     | 1.68 (1.39-2.05)     | 1.53 (1.27-1.83)     | 12.76 (3.19-50.90)   | 9.28 (2.32-37.00)    | 8.41 (2.11-33.5)     |
| >20%                                    | 1.95 (1.60-2.38)     | 1.67 (1.36-2.04)     | 1.45 (1.20-1.75)     | 18.42 (4.59-73.95)   | 10.71 (2.66-43.10)   | 9.32 (2.32-37.4)     |
| <b>Population Attributable Fraction</b> | 0.40 (0.27-0.50)     | 0.35 (0.21-0.46)     | 0.30 (0.17-0.42)     | 0.91 (0.62-0.98)     | 0.87 (0.49-0.97)     | 0.86 (0.46-0.97)     |

|                                                             |
|-------------------------------------------------------------|
| <sup>a</sup> Model 1: adjusted for age, sex, race/ethnicity |
| <sup>b</sup> Model 2: Model 1 + urbanicity                  |
| <sup>c</sup> Model 3: Model 2 + statewide gun prevalence    |
